# Supplementary material for: Phosphodiesterase 1C integrates store-operated calcium entry and cAMP signaling in leading-edge protrusions of migrating human arterial myocytes
Source: PubMed Central journal article supplement (PMC8095186; doi:10.1016/j.jbc.2021.100606), 2021-03-28
Supplement: mmc1.pdf [file mmc1.pdf]

## Supplementary Material

### Phosphodiesterase 1C integrates store-operated calcium entry and cAMP signaling in leading-edge protrusions of migrating human arterial myocytes

Paulina Brzezinska<sup>1</sup>, Nicholas J. Simpson<sup>1</sup>, Fabien Hubert<sup>1</sup>, Ariana N. Jacobs<sup>1</sup>, M. Bibiana Umana<sup>1</sup>, Jodi L. MacKeil<sup>1</sup>, Jonah Burke-Kleinman<sup>1</sup>, Darrin M. Payne<sup>2</sup>, Alastair V. Ferguson<sup>1</sup> and Donald H. Maurice<sup>1</sup>

Department of Biomedical and Molecular Sciences<sup>1</sup> and Department of Surgery<sup>2</sup>  
Queen's University, Kingston, Ontario, Canada, K7L 3N6

## Supplementary Reagents

**Supplementary Table 1. Target genes and siRNA sequences**

| Target   | siRNA ID                                                    | Sense                                                  | Antisense                                               | Source                       |
|----------|-------------------------------------------------------------|--------------------------------------------------------|---------------------------------------------------------|------------------------------|
| Control  | Silencer select negative control No.1 siRNA                 | N/A commercial product                                 |                                                         | Thermofisher                 |
| PDE1C #1 | PDE1CHSS182019                                              | 5'-CACCAGCUGUU<br>AUUGAGGCAUAAAA-3'                    | 5'-UUUAAUGCCUCA<br>AUAACAGCUGGUG-3'                     | Invitrogen                   |
| PDE1C #2 | PDE1CHSS107703                                              | 5'-UUAAGCAAAGAU<br>CUCCAGCUCCGUC-3                     | 5'-CACCAGCUGUUA<br>UUGAGGCAUAAAA-3'                     | Invitrogen                   |
| ADCY6    | J-006636-06,<br>J-006636-07,<br>J-006636-08,<br>J-006636-09 | 5'-GUGAAUGUCUCUAGUCGUA-3',<br>5'-GUCCUUGGCUUGCGAAU-3', | 5'-CCACAUCACUCGGGCAACA-3',<br>5'-GUGGUUCUCUGUCCCUAA-3', | Dharmacon<br>(ON-TARGETplus) |
| ADCY8    | S1036                                                       | 5'-GCUGUAUUCU<br>CAAUCCUAUtt-3'                        | 5'-AUAGGAUUGA<br>GAAUACAGtc-3'                          | Ambion                       |
| PKA      | PRKACAVHS50343                                              | 5'-GGAAGCUCCU<br>UCAUACCAAAGUUU-3'                     | 5'-AAACUUUGGUAU<br>GAAGGGAGCUUCC-3'                     | Invitrogen                   |

**Supplementary Table 2. Reagents and resources**

| Antibodies                    | Source                           | Identifier    | Working Concentration |
|-------------------------------|----------------------------------|---------------|-----------------------|
| Rabbit polyclonal anti-PDE1C  | Fabgenix                         | PD1C-301AP    | 1:1000                |
| Goat polyclonal anti-PDE1C    | Santa Cruz                       | T-17:sc-54939 | 1:500                 |
| Mouse monoclonal anti-PKAc    | BD Biosciences                   | 610980        | 1µg/ml                |
| Rabbit polyclonal anti-AKAP79 | Upstate Cell Signaling Solutions | 07-235        | 1:5000                |
| Rabbit polyclonal anti-ADCY8  | Proteintech                      | 55065-1-AP    | 1:500                 |
| Mouse monoclonal anti-R11β    | BD Transduction Laboratories     | 610625        | 1:1000                |
| Rabbit monoclonal RI-α        | Cell Signaling                   | D54D9         | 1:1000                |

|                                  |                   |               |         |
|----------------------------------|-------------------|---------------|---------|
| Goat polyclonal anti-Gravin      | Abcam             | Ab9698        | 1:1000  |
| Rabbit polyclonal anti-STIM1     | Cedarlane         | A303414am     | 1:1000  |
| Goat polyclonal anti-Orai1       | Novus biologicals | Nbp1-06992    | 1:300   |
| Rabbit anti-GFP                  | ThermoFisher      | A11122        | 1:1000  |
| Mouse anti-c-myc                 | Sigma-Aldrich     | m-4439        | 1:1000  |
| Mouse monoclonal anti-HA         | Santa Cruz        | (F-7) sc-7392 | 1:1000  |
| Mouse anti-FLAG M2               | Sigma-Aldrich     | F3165         | 1:1000  |
| Mouse monoclonal anti Beta Actin | Sigma-Aldrich     | A5441         | 1:10000 |
| anti-Beta Tubulin                | Sigma-Aldrich     | T5293         | 1:1000  |

| Chemical and peptides                                        | Source                                                                                                                         | Identifier |
|--------------------------------------------------------------|--------------------------------------------------------------------------------------------------------------------------------|------------|
| Collagenase from Clostridium histolyticum lyophilized powder | Sigma-Aldrich                                                                                                                  | C9722      |
| Lipofectamine 3000                                           | Invitrogen                                                                                                                     | L3000015   |
| Crotalus atrox snake venom                                   | Creative Enzymes                                                                                                               | NATE-0072  |
| [ <sup>3</sup> H]-cyclic AMP                                 | Perk in Elmer                                                                                                                  | 2016103    |
| [[ <sup>3</sup> - <sup>3</sup> H] Hypoxanthine               | American Radiolabeled Chemicals Inc                                                                                            | ART 0266   |
| Cilostamide                                                  | Calbiochem                                                                                                                     | 231085     |
| Ro-20-1724                                                   | Calbiochem                                                                                                                     | 557502     |
| C33                                                          | Generous gift from James Guy Breitenbucher (Dart Neuroscience)                                                                 | N/A        |
| PF-04827726                                                  | Sigma                                                                                                                          | Pz0379     |
| Forskolin                                                    | Sigma                                                                                                                          | F3917      |
| 8-Methoxymethyl-3-isobutyl-1-methylxanthine (IBMX)           | Calbiochem                                                                                                                     | 454202     |
| Ca <sup>2+</sup> /Calmodulin Solution 10X                    | Abcam                                                                                                                          | Ab189137   |
| PK1 (1422) myristylated PTD                                  | ThermoFisher                                                                                                                   | 77409      |
| St-Ht31                                                      | Promega                                                                                                                        | V821A      |
| St-Ht31 P                                                    | Promega                                                                                                                        | V822A      |
| Cyclopiazonic Acid (CPA)                                     | Sigma                                                                                                                          | C1530      |
| Fura-2AM                                                     | Invitrogen                                                                                                                     | F1201      |
| Pluronic F-127                                               | Invitrogen                                                                                                                     | P3000MP    |
| Ionomycin                                                    | Sigma-Aldrich                                                                                                                  | 10634      |
| EGTA                                                         | ICN Biomedicals                                                                                                                | 195174     |
| Gelatin                                                      | BioRad                                                                                                                         | 1706537    |
| atrial natriuretic peptide (ANP) human                       | Sigma-Aldrich                                                                                                                  | A1663      |
| Sildenafil                                                   | Extracted from commercially available Viagra® tablets as described in <i>Proc Natl Acad Sci U S A.</i> 105(36), 13650-5 (2008) | N/A        |
| SQ 22536                                                     | Sigma                                                                                                                          | S153       |
| Phalloidin                                                   | Sigma                                                                                                                          | P1951      |
| DAPI                                                         | ThermoFisher                                                                                                                   | D3571      |
| PowerUP™ SYBR™ Green Master Mix                              | ThermoFisher                                                                                                                   | A25742     |
| normal goat IgG                                              | Santa Cruz                                                                                                                     | Sc-2028    |

| Recombinant DNA or virus   | Source                                 | Identifier      |
|----------------------------|----------------------------------------|-----------------|
| myc-ORAI1                  | Anjana Rao, Addgene                    | Plasmid # 21638 |
| CFP-STIM1                  | Tobias Meyer, Addgene                  | Plasmid #18858  |
| FLAG-PDE1C                 | Generous gift from Chen Yan            | N/A             |
| GFP-PDE3B                  | Generous gift from Vincent Manganiello | N/A             |
| GFP-PDE4D7                 | Generous gift from George Baillie      | N/A             |
| mTurq2ΔEPACcp173Ven Ven    | Generous gift from Jalink Kees         | N/A             |
| pcDNA3-AKAR4               | Jin Zhang, Addgene                     | Plasmid #61619  |
| HA-ADCY8 adenovirus        | Abgood                                 | 067660A         |
| LifeAct-TagGFP2 adenovirus | Ibidi                                  | 60121           |

| Commercial Kits                                   | Source     | Identifier |
|---------------------------------------------------|------------|------------|
| DEAE-Sephadex® A-25 beads                         | Sigma      | A25120     |
| Human Aortic Smooth Muscle Cell Nucleofector™ Kit | Lonza      | VAPC-1001  |
| Protein A/G Plus beads                            | Santa Cruz | Sc-2003    |
| Qiagen RNeasy Kit                                 | Qiagen     | 74104      |
| Qiagen Omniscript RT                              | Qiagen     | 205111     |

| Transfection and Transduction Reagents | Source     | Identifier |
|----------------------------------------|------------|------------|
| Lipofectamine 3000                     | Invitrogen | L3000015   |

|                                           |       |          |
|-------------------------------------------|-------|----------|
| TransfeX™ Transfection Reagent            | ATCC  | ACS-4005 |
| ibiBoost Adenovirus Transduction Enhancer | Ibidi | 50301    |

### Supplementary Table 3. Primers for real-time qPCR

| Target       | Sense                        | Antisense                    |
|--------------|------------------------------|------------------------------|
| PDE1C        | 5'-CAGCAAAAGCATGGGACCTC-3'   | 5'-TGAAGGTGGGTTCACGATG-3'    |
| PKA $\alpha$ | 5'-ATGTTCTCACACCTACGGCG-3'   | 5'-CCAGCGAGTGCAGATACTCA-3'   |
| ADCY6        | 5'-GAGATCATCGCTGACTTTGATG-3' | 5'-TCGTAGGTGCTGGCGTTC-3'     |
| ADCY8        | 5'-TCAAGCCATTCTCACTGATGT-3'  | 5'-TGAACACTTCATCCCTCATTTG-3' |
| TBP          | 5'-TATAATCCCAAGCGGTTTGC-3'   | 5'-GCTGGAAAACCCAACCTTCTG-3'  |
| PGK          | 5'-CTGTGGGGGTATTGAATGG-3'    | 5'-CTTCCAGGAGCTCCAAACTG-3'   |

## Supplementary Methods

### *Cell Culture and siRNA Transient Transfections*

Human internal thoracic artery smooth muscle cells (HASMCs) were isolated from discarded unused portions in coronary artery bypass graft surgeries as described by Moss and colleagues [27] from donor patients of Kingston General Hospital as well as purchased from Cell applications. For tissues obtained from KGH, their use in this research study (SURG-334-15; “Endothelial cell function in human hearts”) was approved by the Queen’s University Health Sciences & Affiliated Teaching Hospitals Research Ethics Board (HSREB). HASMCs were cultured in smooth muscle basal medium (SMBM) and smooth muscle growth medium bullet kit (SMGM-2) (Lonza), supplemented with 10% FBS, cultured at 37°C in 5% CO<sub>2</sub> and used between passages 4-9. The received tissue was rinsed and maintained in HBSS. The artery was incubated in 2mg/mL of type 1 collagenase in HBSS for 15 min at 37°C and the adventia was then removed. The artery was cut longitudinally, and the endothelium were manually scraped off. The artery was further cut into 1-2 mm<sup>3</sup> pieces and digested in new 2 mg/mL type 1 collagenase solution in HBSS for 1-2 h at 37°C. The tissue was then centrifuged at 1500 RPM for 10 min, and pelleted SMCs were collected and seeded in a 25cm<sup>2</sup> flask containing SMGM-2 supplemented with 10% FBS. For siRNA transfection, HASMCs were cultured in basal SMBM containing Lipofectamine 3000 (Invitrogen) and siRNA in a 1:1 ratio and media was changed 5 h post transfection with SMGM-2. Experiments were conducted 48 h post transfection. The following siRNAs used are indicated in **Supplementary Table 1**.

### *cAMP PDE Activity Assay*

cAMP PDE enzymatic activity was determined by a two-step radioenzymatic assay as previously described [28, 29]. Individual reactions were performed in a total volume of 250  $\mu$ l containing the following; 1  $\mu$ M [<sup>3</sup>H]-cyclic AMP (100 000 dpm) in a solution containing; 20 mM Tris, 20 mM Imidazole, 3 mM MgCl<sub>2</sub>, 0.2 mg/mL BSA, 4  $\mu$ g/mL calmodulin, 0.04 mM CaCl<sub>2</sub> pH 7.5, with the following PDE inhibitors: PDE3 inhibitor (Cilostamide 5  $\mu$ M; Cedarlane), PDE4 inhibitor (Ro 20-

1724 10  $\mu\text{M}$ ; Calbiochem), PDE1 inhibitor (Compound C33 (C33) 1  $\mu\text{M}$ ; generous gift from Dr. James Guy Breitenbucher (Dart Neuroscience), and PDE1 inhibitor (PF-04827726 1  $\mu\text{M}$ ; Sigma). The reaction was initiated by incubation of samples at 30°C for 30 min and terminated by boiling the reaction for 1 min. 5'AMP product was converted to adenosine by the addition of snake venom. The samples were run through DEAE–Sephadex® A-25 beads (Sigma) packed in chromatography columns, using a low salt buffer to elute samples off the column. The eluted samples were diluted with scintillation cocktail fluid (50%; Fisher) and measured using the LS 6500 Multi-Purpose Scintillation Counter.

#### *cAMP activity assay*

Confluent monolayers of HASMCs were incubated overnight with [ $^3\text{H}$ ]-hypoxanthine to label intracellular cyclic nucleotide metabolic pools as described previously [30]. After removal of labeling media, cells were resuspended in SMBM and plated on 0.25% gelatin coated wells and incubated (37°C, 5%  $\text{CO}_2$ ) for 2 h. HASMCs were treated with forskolin or received no treatment for 1 min. Reactions were terminated by TCA. cAMP was isolated and purified via column chromatography and [ $^3\text{H}$ ]-cAMP was determined using the LS 6500 Multi-Purpose Scintillation Counter.

#### *Chemotactic leading edge protrusion assays*

HASMCs resuspended in SMBM basal media were plated on the upper surface of gelatin-coated ((ddH<sub>2</sub>O supplemented with 0.25% gelatin (Biorad)), 24 mm<sup>2</sup>-diameter BD Falcon Fluoroblok™ cell culture inserts forming a monolayer (3  $\mu\text{m}$ ) to investigate leading edge protrusion as previously conducted [31, 32]. Chemotaxis was initiated by adding 0.5% FBS to the underside of the inserts to allow cells to form leading edge protrusions or migrate for 4 h. Pharmacological activators or inhibitors were added to the top of the insert prior to the addition of FBS to the underside of the inserts. The following drugs were used: forskolin (Sigma), PKI (1422) myristylated PTD (Thermofisher), st-Ht31P and st-HT31 (Promega), atrial natriuretic peptide (ANP) human (Sigma), and the following PDE inhibitors, C33, PF-04827726, cilostamide and Ro 20-1724. To visualize the extent of leading edge protrusion, inserts were fixed with paraformaldehyde (4% (vol/vol)), rinsed with HBSS and incubated for 1 h with phalloidin-tetramethylrhodamine B isothiocyanate (1:1000; Sigma) and DAPI (1:1000; Thermofisher) (0.3% BSA diluted in HBSS). Inserts were mounted on glass slides and the density of leading edge protrusions was quantified by measuring the total fluorescence of phalloidin-TRITC on the bottom of the insert by imaging 4-5 quadrants in 1-3 transwells per condition, per experiment. Images were obtained with a Zeiss Axiovert S100 microscope and imaged with Slidebook software. Visualization of real-time leading edge protrusions was conducted by transducing HASMCs with the LifeAct-TagGFP2 adenovirus with an MOI of 1000. Following 72 h infection, HASMCs were plated on 24 mm<sup>2</sup>-diameter (3  $\mu\text{m}$ ) BD Falcon cell culture inserts and imaged as indicated above.

#### *Visualization of proteins in whole cell bodies versus the leading edge*

Protein localization in leading edge protrusions or cell bodies was visualized by transiently transfecting a monolayer of HASMCs with 2  $\mu\text{g}$  of DNA plasmids (**Supplementary Table 2**) (myc-Orai1, GFP-STIM1, FLAG-PDE1C, GFP-PDE3B, GFP-PDE4D7) using TransfeX™

(ATTC) as recommended by the manufacturer's protocol and plating cells on 3  $\mu\text{m}$  inserts 48 h post transfection. HA-ADCY8 adenovirus (Abgood) was infected in HASMCs with an MOI of 0.1 using Ividi Boost (Ividi) according to the manufacturer's protocol and plating cells on 3  $\mu\text{m}$  24  $\text{mm}^2$ -diameter BD Falcon cell culture inserts 72 h post infection. Following plating HASMCs on inserts in SMBM containing media, 0.5% FBS diluted in SMBM was added to the bottom of the transwell, and cells were allowed to extend leading edge protrusions for 4 h. Specific proteins were visualized by fixing the inserts with paraformaldehyde (4% (vol/vol)), rinsed with HBSS and incubated for 1 h with the following primary antibodies: anti-c-myc mouse monoclonal (Sigma 1:1000), anti-GFP monoclonal rabbit (Santa Cruz 1:1000), anti-Flag M2 monoclonal mouse (Sigma 1:1000), for 1 h at room temperature or anti-AKAP79 rabbit polyclonal (Upstate Cell Signaling Solutions 1:100) at 4°C for 16 h. The inserts were then washed with HBSS and incubated with fluorescently-labelled Alexa-conjugated (488 nm) secondary antibodies and with phalloidin-tetramethylrhodamine B isothiocyanate (1:1000) and DAPI (1:1000) (0.3% BSA diluted in HBSS). The inserts were mounted on glass slides and protein localization at the leading edge was visualized using a Leica TCS SP8 confocal laser scanning microscope.

### *Fura-2 $\text{Ca}^{2+}$ imaging*

Measurement of  $[\text{Ca}^{2+}]_i$  in HASMCs was performed using the ratiometric  $\text{Ca}^{2+}$  indicator Fura-2 AM, as described previously [33]. Fura-2 AM (kept in the dark at -20°C; Invitrogen) was dissolved in DMSO to a concentration of 1 mg/mL. Pluronic F-127 (Invitrogen; 0.5  $\mu\text{L}/\mu\text{L}$  of DMSO) was added and the resulting solution was briefly vortexed. HASMCs were loaded with 5  $\mu\text{M}$  Fura-2 AM in Krebs solution containing (in mM): 125 NaCl, 5 KCl, 1  $\text{Na}_2\text{HPO}_4$ , 1  $\text{MgCl}_2$ , 5.6 Glucose, 20 Hepes and 2  $\text{CaCl}_2$  pH, 7.40, for 30 min at room temperature. For  $\text{Ca}^{2+}$  free solutions, the  $\text{CaCl}_2$  was omitted and EGTA (25  $\mu\text{M}$ ) was added to the buffer. The cells were then washed with Krebs and kept at room temperature for an additional 30 min prior to imaging. Fluorescence emitted from Fura-2 AM was captured with an InCyt dual-wavelength imaging system (Intracellular Imaging) and a PixelFly CCD camera (1360x1024 resolution) mounted on a Nikon Eclipse TS100 (Nikon). HASMCs were perfused at a flowrate of 3 ml/min and were allowed to equilibrate for >5 minutes prior to data collection. Data was collected at 0.167 Hz. Cell viability was determined by a brief (15s) application of 5  $\mu\text{M}$  ionomycin (Sigma) at the end of the experiment. The change in the ratio induced during store depletion by 10  $\mu\text{M}$  cyclopiazonic acid (CPA; Sigma) in  $\text{Ca}^{2+}$  free Krebs buffer and the change in the ratio induced by SOCE was determined as the difference between the peak during  $\text{Ca}^{2+}$  free Krebs + CPA and the trough prior to bath application of  $\text{Ca}^{2+}$  free Krebs + CPA and the difference between the peak during Krebs + CPA and the trough prior to bath application of Krebs + CPA, respectively. The rate in change during store depletion ( $\text{Ca}^{2+}$  free + CPA) and SOCE (Krebs + CPA) was determined as the difference in the ratio value between the peak drug response and the trough before drug response/ the time difference between the point at which the drug has reached the peak response and the trough time point prior to drug response.

### *Fluorescence Resonance Energy Transfer (FRET) imaging cAMP and PKA*

FRET-based measurements of cAMP or PKA in HASMCs were carried out as follows: HASMCs were transiently transfected with the mTurq2 $\Delta\text{EPAC}^{\text{cp173}}$ Ven\_Ven sensor (a gift from Jalink Kees; Lab ID Epac-SH134) for the detection of cAMP activity and HASMCs were transiently transfected with the pcDNA3-AKAR4 sensor (a gift from Jin Zhang; Addgene plasmid #61619) for the

detection of PKA activity using TransfeX (ATCC) in accordance with manufacturer's instructions. Following transfection, cells were plated on glass coverslips coated with gelatin (0.25%) and imaged at room temperature 24 h post transfection. Real-time FRET was performed using the Leica DMI8 inverted microscope equipped with a HC PL FLUOTAR 40×/1.30 oil immersion objective, a Leica EL6000 light source and a C11440 ORCA-Flash 4.0 digital camera (Hamamatsu). The following solutions were incubated in HASMCs to perform the SOCE protocol; Krebs, Ca<sup>2+</sup> free Krebs for 5 min to capture a baseline, addition of CPA (10 μM) for 5 min, followed by Ca<sup>2+</sup> containing Krebs with CPA (10 μM) for 10min, followed by saturation of the cAMP or PKA probe with 10 μM forskolin (Sigma) and 100 μM 3-Isobutyl-1-methylxanthine (Calbiochem). Three filter sets (CHROMA) were used to acquire images: for CFP, excitation filter 430/424 nm, emission 470 nm; for FRET (CFP/YFP) cube, excitation 430/24 nm, DC 440 nm; 520 nm, emission 540 nm, for YFP, excitation 500/520 nm, emission 535 nm. Images were acquired every 5 s with an exposure of 150-449 ms and processed using LAS X Version 2.0.0.14332 software (Leica). FRET-based measurements were quantified by defining a region of interest (ROI) per whole cell. FRET was measured in the selected ROI of each image acquired by capturing fluorescence in three channels; CFP for direct donor excitation and emission, YFP-FRET for donor-sensitized acceptor emission and YFP for direct acceptor excitation and emission. Calculation of the FRET efficiency was determined by performing a background correction in each fluorescence channel captured by subtracting the background fluorescence intensity in a ROI that contained no cells from the emission intensity from the cells expressing the biosensor. FRET emission ratios (YFP-FRET/CFP) were calculated for each time point and normalized over the time course by dividing the emission ratio at each time point by the value preceding drug application. Data is presented as single representative tracings from individual cells. Mean changes in FRET were obtained by determining the maximal peak response following drug application from the preceding baseline and mean changes in the change in rate were determined by quantifying the slope from time of drug application to the time at which the drug response plateaus.

### *Immunoprecipitations and western blotting*

To immunoprecipitate endogenous PDE1C, HASMCs were grown to confluent monolayers and lysates were collected using triton based lysis buffer in mM: 1.0% Triton X-100, 100 sodium pyrophosphate, 10 sodium β- glycerophosphate, 5 benzamidine, 10 sodium orthovanadate, 50 Tris-HCl, 100 sodium chloride, 1 EDTA, 5 magnesium chloride, 0.5 calcium chloride, 10 PMSF, and the following protease inhibitors in μg/ml: 1 pepstantin A, 1 E-64, 5 bestantin, 1 aprotinin, 2 leupeptin. Lysates were homogenized (20G needle), centrifuged at 10 000 RPM and a fraction of the supernatant was collected for analysis of total lysate (input). To reduce nonspecific binding, lysates were precleared with Protein A/G Plus beads (40μl bed volume: Santa Cruz) for 3 h with anti-IgG goat (1μg/ml: Santa Cruz). Following centrifugation (5000 RPM), lysates were collected and immunoprecipitated with 1μg/ml of anti-PDE1C (Santa Cruz) with Protein A/G Plus beads (40μl bed volume) for 16 h at 4°C. The beads were washed 3X with triton lysis buffer and protein was eluted at 37°C for 30 min followed by immunoblotting. Antibodies and working concentrations for immunoblotting are indicated in the (**Supplementary Table 2**). anti-PDE1C (Fabgenix) was used for immunoblotting to determine the knockdown efficiency of PDE1C following 48 h siRNA treatment and anti-PDE1C (Santa Cruz) was used for immunoblotting of PDE1C following immunoprecipitation of PDE1C.

### *RNA isolation, reverse transcription and qPCR*

HASMC RNA was isolated using the Qiagen RNeasy (Qiagen) mini kit as per manufacturer's instructions followed by measurement of RNA purity and concentration using a Nanodrop 1000 (Thermo Scientific). cDNA was synthesized using a Qiagen Omniscript RT according to the manufacturer's instructions. qPCR reactions were performed using PowerUP™ SYBR™ Green Master Mix (Thermo Fisher Scientific) with 2 ng cDNA template and the following primers used are indicated in (**Supplementary Table 3**). Thermocycler conditions were the following using the QuantStudio 5 Real-Time PCR System: PCR Stage: Step 1 95°C 15 min, Step 2 60°C 1 min repeated 40X, Melt Curve Stage: Step 1 95°C 15 min, Step 2 60°C 1 min, Step 3 Dissociation 95°C 1s.

#### *Puncta visualization and quantification of STIM1 to ORAI translocation*

HASMCs were transfected with myc-ORAI1 and GFP-STIM1 using 2µg of DNA using the HASMC nucleofector kit (Lonza) according to the manufacturer's instructions and the Nucleofector™ 2b Device (Lonza). Following 24 h post DNA transfection, cells were plated on gelatin-coated coverslips (ddH<sub>2</sub>O supplemented with 0.25% gelatin) and following 48 h post DNA transfection, cells were subjected to Krebs buffer for 5 min, followed by store depletion (Ca<sup>2+</sup> free + CPA 10 µM) for 5 min. After treatment with Krebs, or store depletion, cells were fixed using paraformaldehyde (4% (vol/vol)), rinsed with HBSS and incubated for 1 h at room temperature with the following primary antibodies: anti-c-myc mouse monoclonal (Sigma 1:1000) and anti-GFP monoclonal rabbit (Santa Cruz 1:1000). The coverslips were then washed with HBSS and incubated with fluorescently-labelled Alexa-conjugated (488 nm) secondary antibodies and with phalloidin-tetramethylrhodamine B isothiocyanate (1:1000) and DAPI (1:1000) (0.3% BSA diluted in HBSS). Imaging was performed using the Leica TCS SP8 confocal microscope (Leica). White light laser (WLL) system was adjusted with settings for the laser line 499 (excitation of Alexa-fluor 488; GFP-STIM1) and 572 nm (excitation for Alexa-fluor 568; myc-Orai1); and UV laser (405 nm) to identify DAPI nucleolus. Individual cells were imaged through a z-stack (Z-dimension of 2-3 µm; pixel size of 0.29 µm) acquisition mode using the HC PL APO CS2 63x/1.40 oil objective. The analysis was performed with the LAS-X Software (Leica Microsystems). To measure the relative mobilization distance of GFP-STIM1 to myc-Orai1 (cell surface), three straight regions of interest (ROI) were drawn per cell initiating it at the central point of each nucleolus and extending to the last bright point representing the cell surface. The intensity of each marker (DAPI, GFP-STIM1 and myc-Orai1) was measured through the ROI (see **Supplementary Fig. 5**). Any intensity peak lower than 5,000 (AU) was considered baseline background. Length measurements of the last peak ( $\rho$ ) of DAP ( $\rho$ DAPI), GFP-STIM1 ( $\rho$ STIM1) and myc-Orai1 ( $\rho$ Orai1) were taken, and the following formula was applied to obtain the relative STIM1 distance to Orai1. The relative STIM1 distance (RdSTIM1) equals 1 was suggestive of STIM1 trafficking to the cell surface.

#### *Statistical Analysis*

All data presented were analyzed using GraphPad Prism Software and used for statistical analysis. Data in this study was collected from at least three independent experiments unless otherwise stated and presented as means  $\pm$  SE. A p value <0.05 was considered significant.





## Supplementary Figure Legends

### Supplementary Figure 1. mTurq2 $\Delta$ EPACcp173Ven\_Ven FRET sensor is sensitive to ADCY inhibition and activation.

*A*, representative single-cell traces measuring changes in cAMP where decreases in the FRET emission (YFP/CFP) indicate an increase in cAMP signal, using the mTurq2 $\Delta$ EPACcp173Ven\_Ven FRET sensor in control (black trace) and SQ 22536 (1 mM) (blue trace) pretreated HASMCs subjected to an increasing concentration of the ADCY activator forskolin, to confirm that the probe is sensitive to ADCY inhibition and activation by SQ 22536 and forskolin respectively. *B*, measurements in the peak FRET response of cells treated with increasing concentrations of forskolin (+/- SQ 22536) relative to the total FRET response of each individual cell. Three groups of comparisons were conducted using a two-way ANOVA, (between control (black) and SQ 22536 (blue) pretreated cells, between increasing forskolin concentration in control cells, and between increasing forskolin concentration in SQ 22536 pretreated cells) in  $n=10$  control cells and  $n=9$  SQ 22536 pretreated cells,  $F(3, 68) = 1.247$ ,  $p=0.2996$  interaction,  $F(3, 68) = 18.74$ ,  $p<0.0001$  (within different Fsk concentrations),  $F(1, 68) = 206.8$ ,  $p<0.0001$  (control versus SQ treatment). Tukey's multiple comparison \*\*\*\* $p<0.0001$  (control versus SQ 22536 pretreated cells), # $p=0.0172$ , ### $p=0.0004$ , ##### $p<0.0001$  (control Fsk 0.01  $\mu$ M versus 0.1  $\mu$ M, 1  $\mu$ M and 10  $\mu$ M Fsk treated cells respectively),  $p=0.0134$  (Fsk 0.01  $\mu$ M (+SQ 22536) versus Fsk 10  $\mu$ M (+SQ 22536)). *C*, pseudocoloured images of HASMCs indicating changes in FRET subjected to increasing concentrations of the ADCY activator forskolin in control and SQ 22536 pretreated HASMCs. Arrows indicate the addition of forskolin at the concentration indicated. Cooler colours indicate lower (YFP/CFP) ratios and higher cAMP levels, scale bars, 20  $\mu$ m.

### Supplementary Figure 2. Changes in HASMC PKA activity associated with ER(Ca<sup>2+</sup>) store depletion or SOCE activation.

*A*, model of the PKA activity sensor, AKAR4, in which a PKA-substrate domain (LRRATLVD) is positioned between a cerulean (donor, blue) and a Venus (acceptor, yellow) domain (top), and representing how increases in phosphorylation of the PKA-substrate domain decreases the distance between the donor and acceptor domains, thus increasing FRET (bottom). *B,C*, representative pseudo-coloured images of individual HASMCs (scale bar 10  $\mu$ m) under initial experimental conditions (Ca<sup>2+</sup>-free Krebs buffer, "0 Ca<sup>2+</sup>"), during ER(Ca<sup>2+</sup>) store depletion (Ca<sup>2+</sup>-free Krebs buffer supplemented with CPA (10  $\mu$ M), "0 Ca<sup>2+</sup> + CPA"), during SOCE (Krebs buffer supplemented with CPA (10  $\mu$ M), 2mM Ca<sup>2+</sup> + CPA") and, lastly, during sensor saturation (Forskolin (10  $\mu$ M) + IBMX (100  $\mu$ M) and representative trace of normalized FRET emission ratio measured in AKAR4-expressing HASMCs under these conditions, respectively. *D, E*, maximal increase in FRET/PKA activity during ER(Ca<sup>2+</sup>) store depletion (*D*) or (*E*) during SOCE, relative to preceding baseline, respectively ( $n=21$  cells, Student's paired t-test\*\*\*\* $p<0.0001$ ).

### Supplementary Figure 3. Characterization of compound 33 (C33).

The molecular structure of compound 33 (C33) and the IC<sub>50</sub> values in (nM) for PDE1, PDE2, PDE3, PDE4 and PDE5 families.

### Supplementary Figure 4. Contribution of Ca<sup>2+</sup> regulation by PDEs expressed in HASMCs.

*A*, representative single-cell traces measuring changes in fura-2 fluorescence ratio (R 340/380) in HASMCs using siRNA targeting PDE5A, PDE3A and PDE4D subjected to the SOCE protocol:

preincubation of HASMCs with  $\text{Ca}^{2+}$  containing Krebs buffer, 5min incubation with  $\text{Ca}^{2+}$  free Krebs + CPA (10  $\mu\text{M}$ ) to deplete ER ( $\text{Ca}^{2+}$ ), 10 min incubation with  $\text{Ca}^{2+}$  containing Krebs buffer + CPA (10  $\mu\text{M}$ ) to induce SOCE to replenish ER ( $\text{Ca}^{2+}$ ). *B*, quantification in the peak change (R 340/380) during SOCE ( $\text{Ca}^{2+}$  containing Krebs buffer + CPA (10  $\mu\text{M}$ )) and normalized to control siRNA, n=48-56 cells, one-way ANOVA,  $F=5.386$ ,  $p=0.0014$ , followed by Dunnett's multiple comparisons  $**p=0.0014$ . *C*, quantification in the peak change (R 340/380) during SOCE ( $\text{Ca}^{2+}$  containing Krebs buffer + CPA (10  $\mu\text{M}$ )) in HASMCs treated with the PDE5 inhibitor sildenafil (100 nM), PDE3 inhibitor cilostamide (5  $\mu\text{M}$ ) and PDE4 inhibitor rolipram (10  $\mu\text{M}$ ). Data normalized to the control, n=33-58 cells, using a one-way ANOVA,  $F=6.016$ ,  $p=0.0006$ , followed by Dunnett's multiple comparisons,  $*p=0.0173$ .

**Supplementary Figure 5. PDE1C silencing does not alter STIM1 translocation to the membrane following store depletion or alter STIM1 protein expression.** *A*, representative low and high magnification of high-resolution deconvoluted confocal images of HASMCs co-transfected with GFP-STIM1 and myc-Orai1 and incubated in Krebs (2 mM  $\text{Ca}^{2+}$ ) for 5 min or in  $\text{Ca}^{2+}$  free Krebs supplemented with (10  $\mu\text{M}$ ) CPA to deplete ER ( $\text{Ca}^{2+}$ ). Inset indicates region of interest zoomed in. Cells visualized by staining with 488-conjugated secondary for GFP-STIM1, 568-conjugated secondary for myc-Orai1 and with DAPI; scale bars, 20  $\mu\text{m}$ . *B*, relative distance of STIM1 to Orai1 quantified and normalized to control Krebs. Unpaired Student's t-test, n=5-7 cells in each group,  $*p=0.0473$ . *C*, representative immunoblot of STIM1 expression using the rabbit polyclonal STIM1 antibody following PDE1C silencing. n=3, unpaired Student's t-test. *D*, quantification of the relative mobilization distance of STIM1 to Orai1 (cell surface) was conducted by drawing three straight regions of interest (ROI) from the central point of each nucleolus and extending the lines to the last bright point representing the cell surface; scale bar, 20  $\mu\text{m}$ . For clarity of presentation, the same image as shown in *A* was used to demonstrate how distances were calculated in *D*. The intensity of each marker (DAPI, STIM1 and Orai1) was measured through the ROI (blue trace represents DAPI intensity, red trace represents Orai1 intensity and green trace represents STIM1 intensity). Any intensity peak lower than 5,000 (Arbitrary Units) was considered baseline background. Length measurements of the last peak ( $\rho$ ) of DAPI ( $\rho\text{DAPI}$ ), STIM1 ( $\rho\text{STIM1}$ ) and Orai1 ( $\rho\text{Orai1}$ ) were taken, and the indicated formula was applied to obtain the relative STIM1 distance to Orai1.

Supplementary Figure 6. PDE4 does not regulate cAMP mediated changes during SOCE in HASMCs.

*A*, representative single-cell traces measuring changes in cAMP using the mTurq2 $\Delta\text{EPACcp173Ven\_Ven}$  FRET sensor in control and Ro 20-1724 (10  $\mu\text{M}$ ) treated HASMCs subjected to the SOCE protocol: preincubation with  $\text{Ca}^{2+}$  free containing Krebs buffer, followed by 5min incubation with  $\text{Ca}^{2+}$  free containing Krebs buffer + CPA (10  $\mu\text{M}$ ) to deplete ER ( $\text{Ca}^{2+}$ ), followed by 10min incubation with  $\text{Ca}^{2+}$  containing Krebs buffer + CPA (10  $\mu\text{M}$ ). *B*, quantification in the percent decrease in FRET (YFP/CFP) (ie. increase in cAMP) during ER ( $\text{Ca}^{2+}$ ) depletion;  $\text{Ca}^{2+}$  free + CPA (10  $\mu\text{M}$ ). *C*, quantification in the percent increase in FRET (YFP/CFP) (ie. decrease in cAMP) during the initial transient phase in SOCE;  $\text{Ca}^{2+}$  + CPA (10  $\mu\text{M}$ ). *D*, quantification in the percent decrease in FRET (YFP/CFP) (ie. increase in cAMP) during the second phase of SOCE;  $\text{Ca}^{2+}$  + CPA (10  $\mu\text{M}$ ). Analysis was conducted in control n= 21 and Ro 20-1724 n=19 cells, Student's unpaired t-test.

Supplementary Figure 7. PDE1C silencing promotes leading edge structures in HASMCs.

*A*, schematic of the leading edge transwell assay. HASMCs are plated on top of a porous 3  $\mu\text{m}$  Fluoroblok™ transwell filter and allowed to form leading edge protrusions for 4 h in response to a chemotactic factor (FBS 0.5%). *B*, representative images of the underside of Fluoroblok™ transwells of chemotactic HASMCs subjected to the leading-edge assay in cells transfected with siRNA control or siRNA PDE1C using an alternative siRNA for PDE1C (PDE1C #2). TRITC-conjugated phalloidin is used to visualize F-actin, scale bars 50  $\mu\text{m}$ . *C*, quantification of LEPs migrated to the bottom of the transwell by normalizing data to siRNA control, from n=3 experiments, Student's unpaired t-test, \*\*\*p<0.0001. *D*, knockdown efficiency of mRNA PDE1C is measured following 48 h of transfecting HASMCs with the alternative siRNA targeting PDE1C (PDE1C # 2) and normalized to the negative siRNA control from n=3 experiments, Student's unpaired t-test, \*\*p=0.0037.

Supplementary Figure 8. SOCE is greater at the leading edge of migrating HASMCs compared to the cell body. *A*, representative single-cell fura-2 traces measuring  $\text{Ca}^{2+}$  in HASMCs at the cell body (soma) or at the front (leading edge) during post ER( $\text{Ca}^{2+}$ ) depletion SOCE activation. *B,C*, comparing (R340/380) at the soma *versus* the leading edge in migrating HASMCs at baseline, or during SOCE activation. n=9 cells, \*p=0.0144, Student's paired t-test.

Supplementary Figure 9. Graphical Abstract. *A* depicting relative ER( $\text{Ca}^{2+}$ ) concentration in polarized migrating cell. *B* scheme of steps involved in PDE1C-mediated regulation of SOCE and of SOCE-mediated activation of ADCY8.

# Supplementary Figure 1

**A**

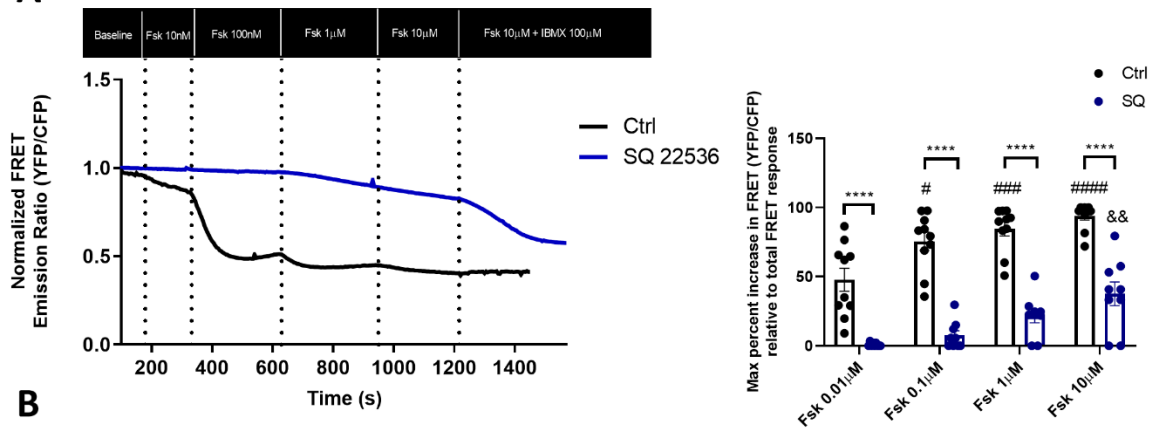

**B**

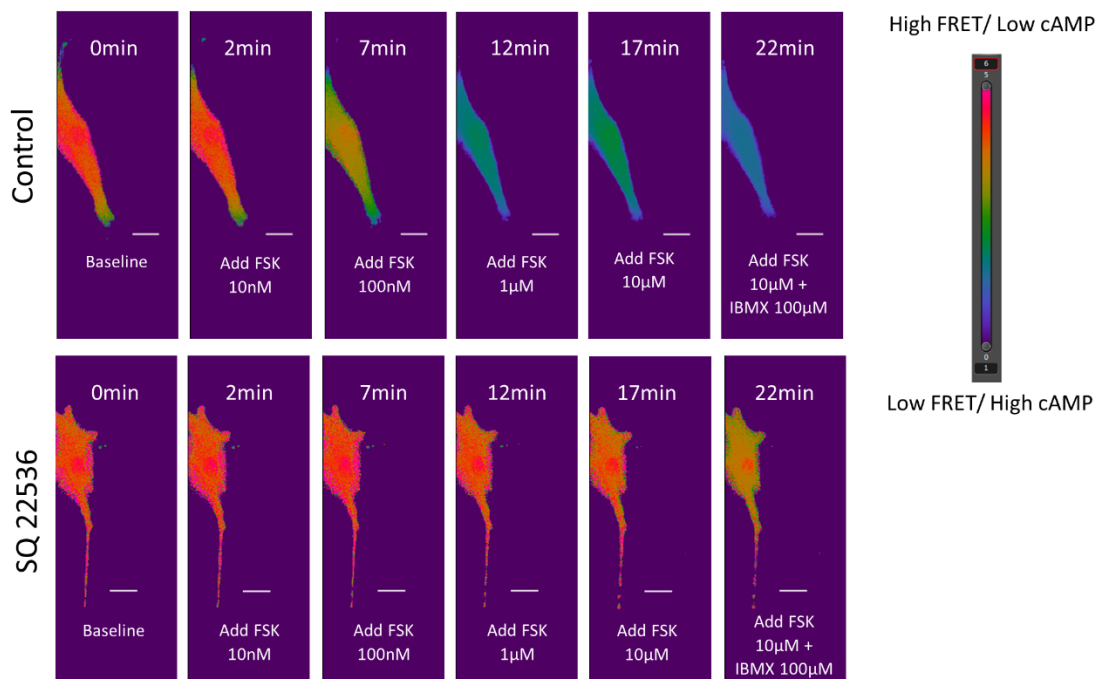

## Supplementary Figure 2

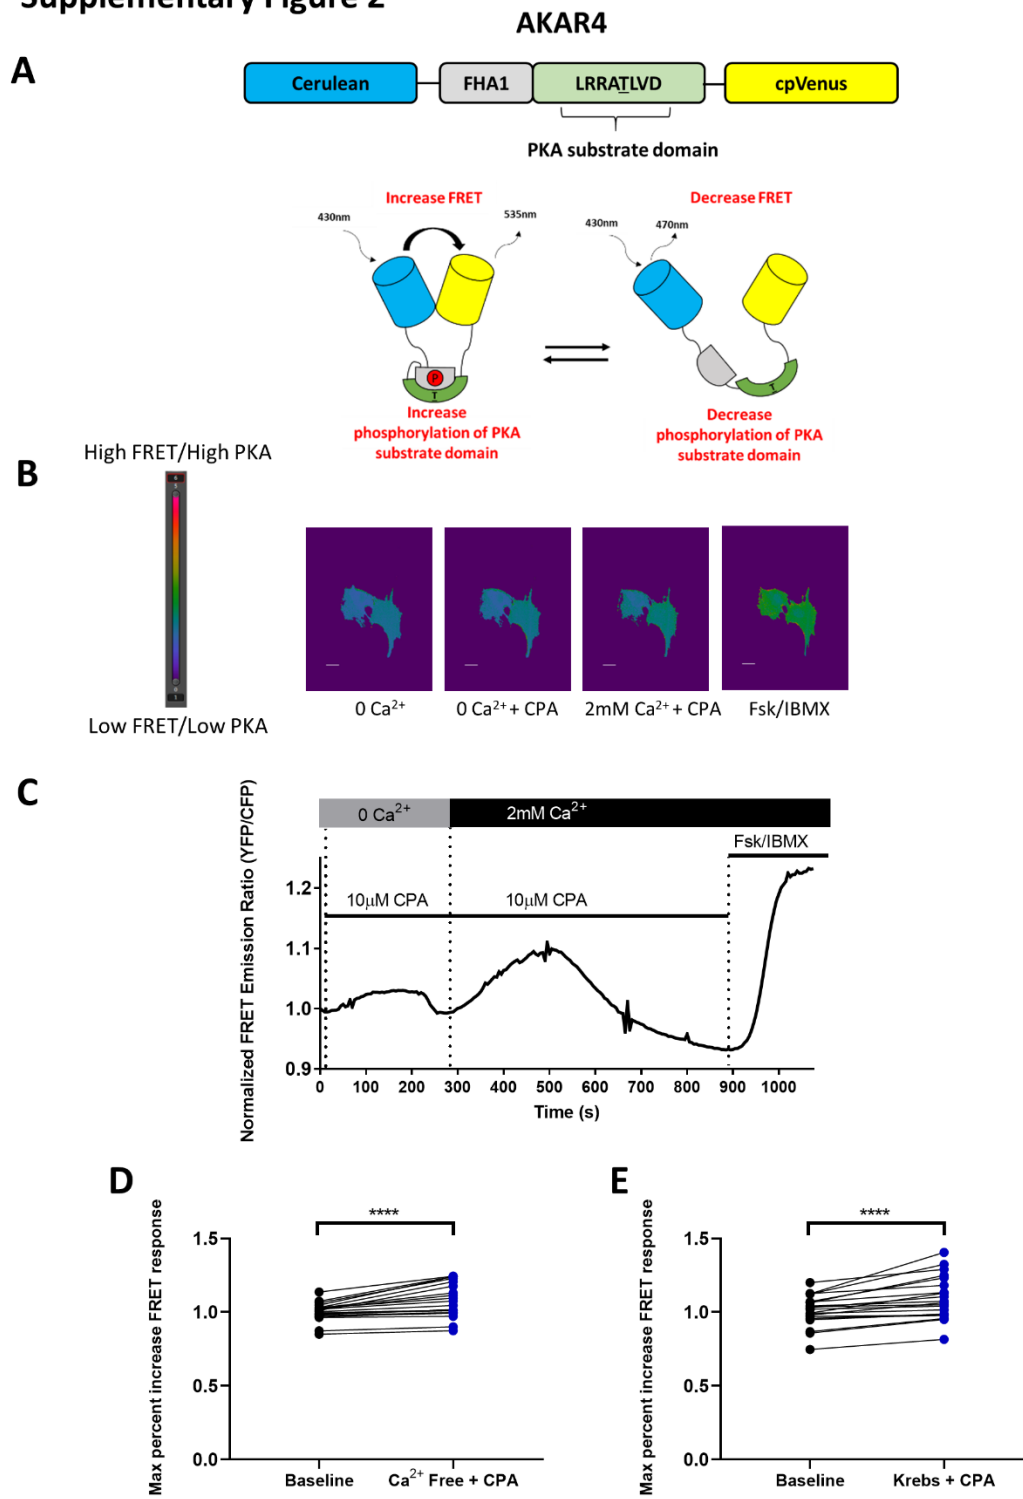

### Supplementary Figure 3

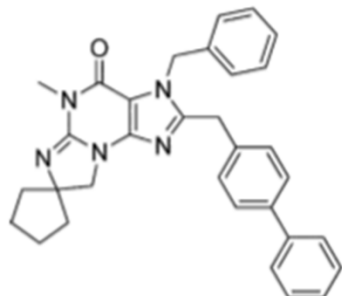

| C33 IC <sub>50</sub> (nM) |      |      |      |      |
|---------------------------|------|------|------|------|
| PDE1                      | PDE2 | PDE3 | PDE4 | PDE5 |
| 0.6                       | 1800 | 7000 | 200  | 200  |

## Supplementary Figure 4

**A**

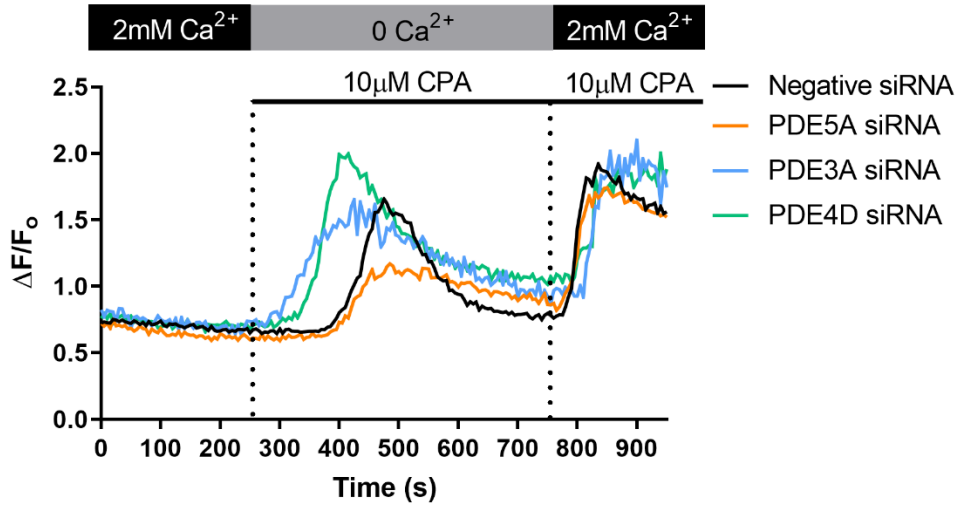

**B**

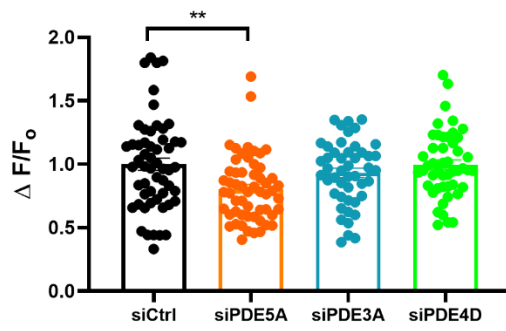

**C**

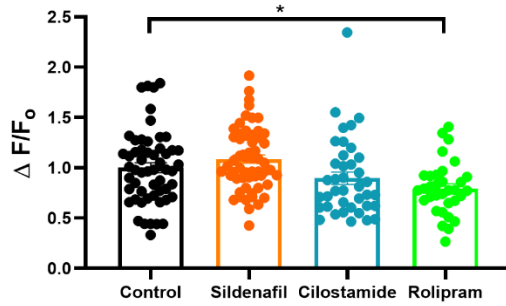

## Supplementary Figure 5

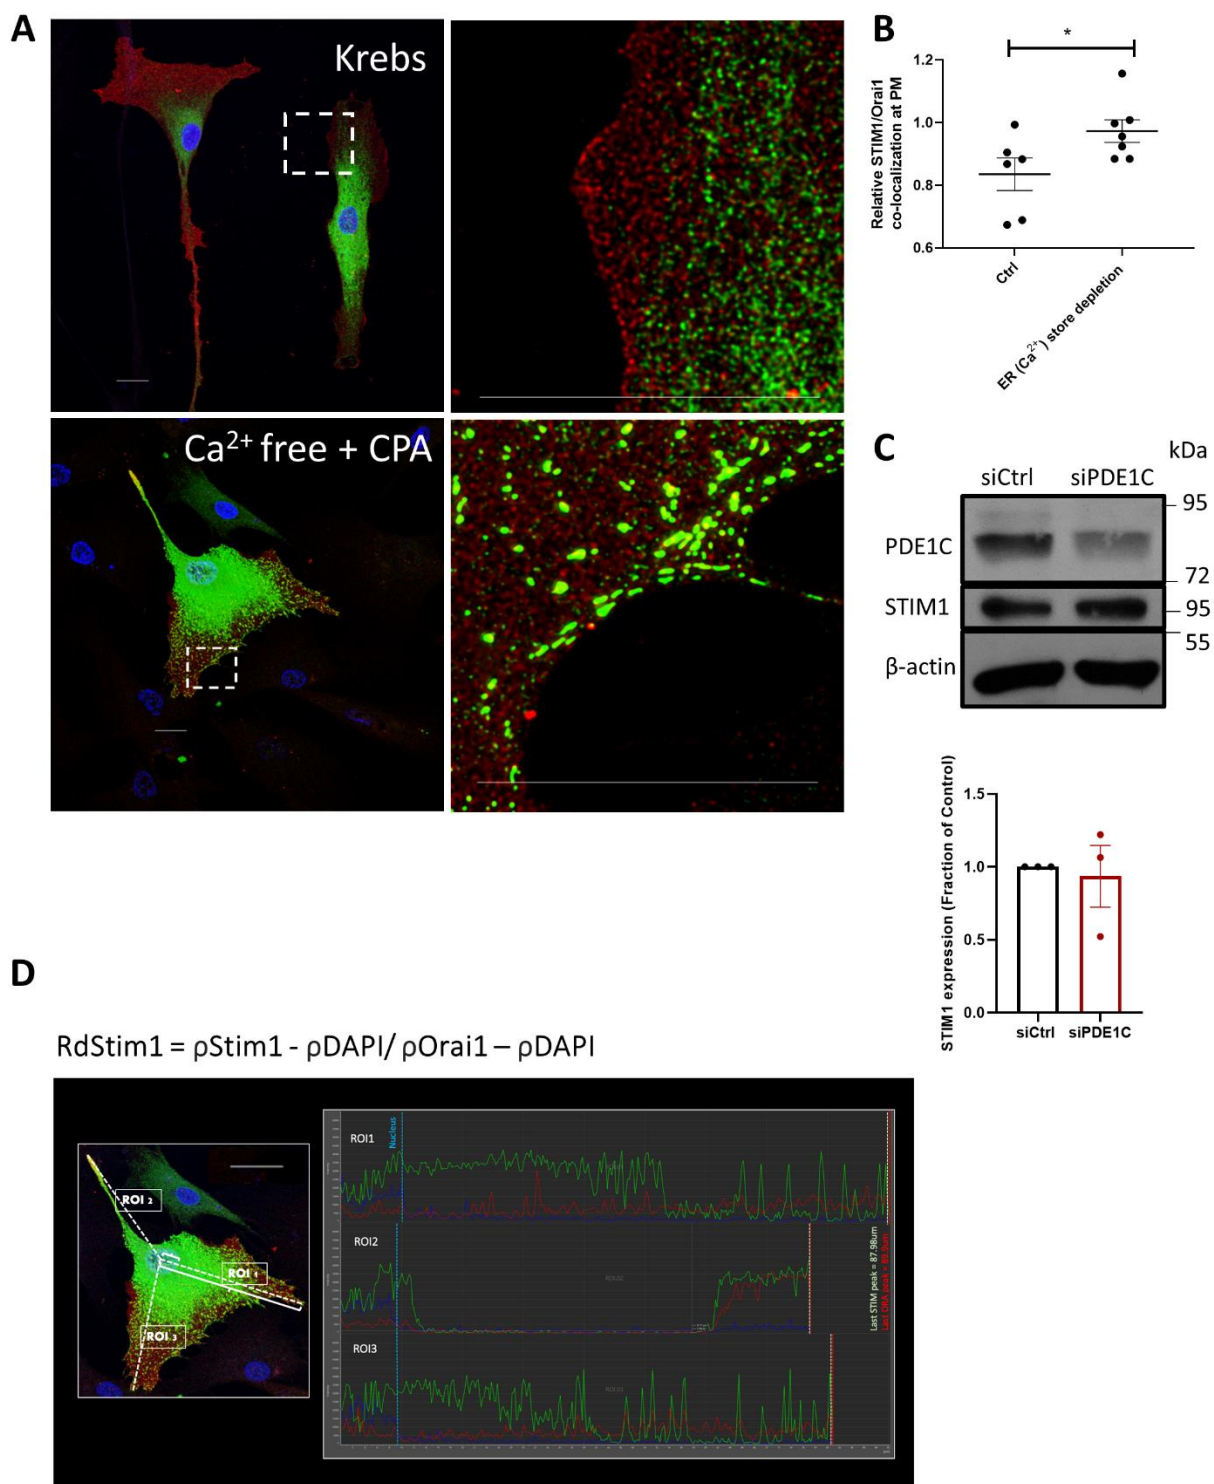



## Supplementary Figure 6

**A**

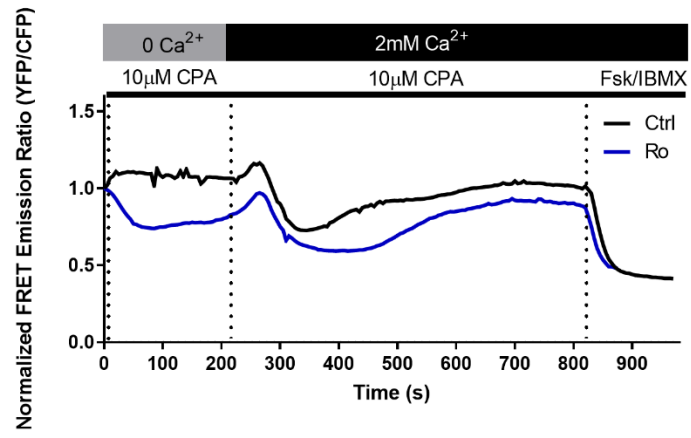

**B**

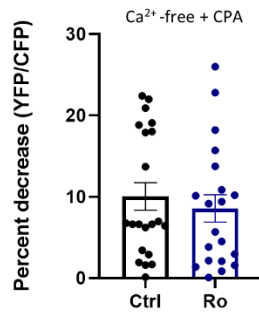

**C**

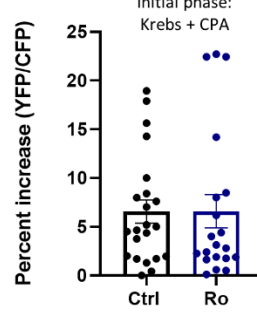

**D**

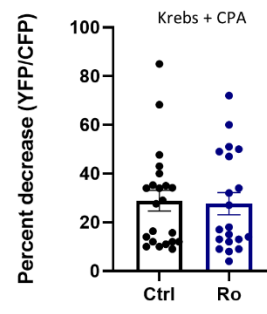

# Supplementary Figure 7

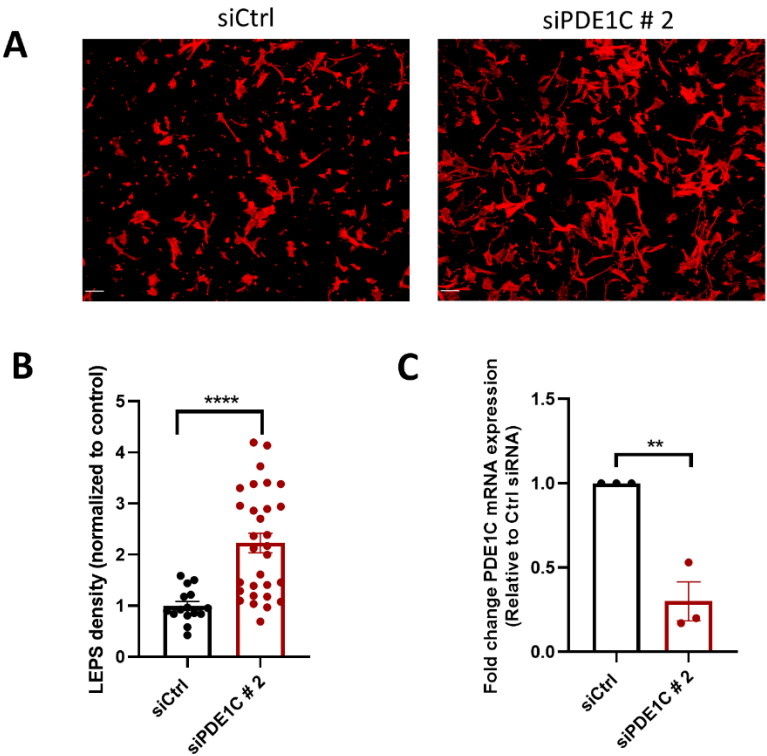

## Supplementary Figure 8

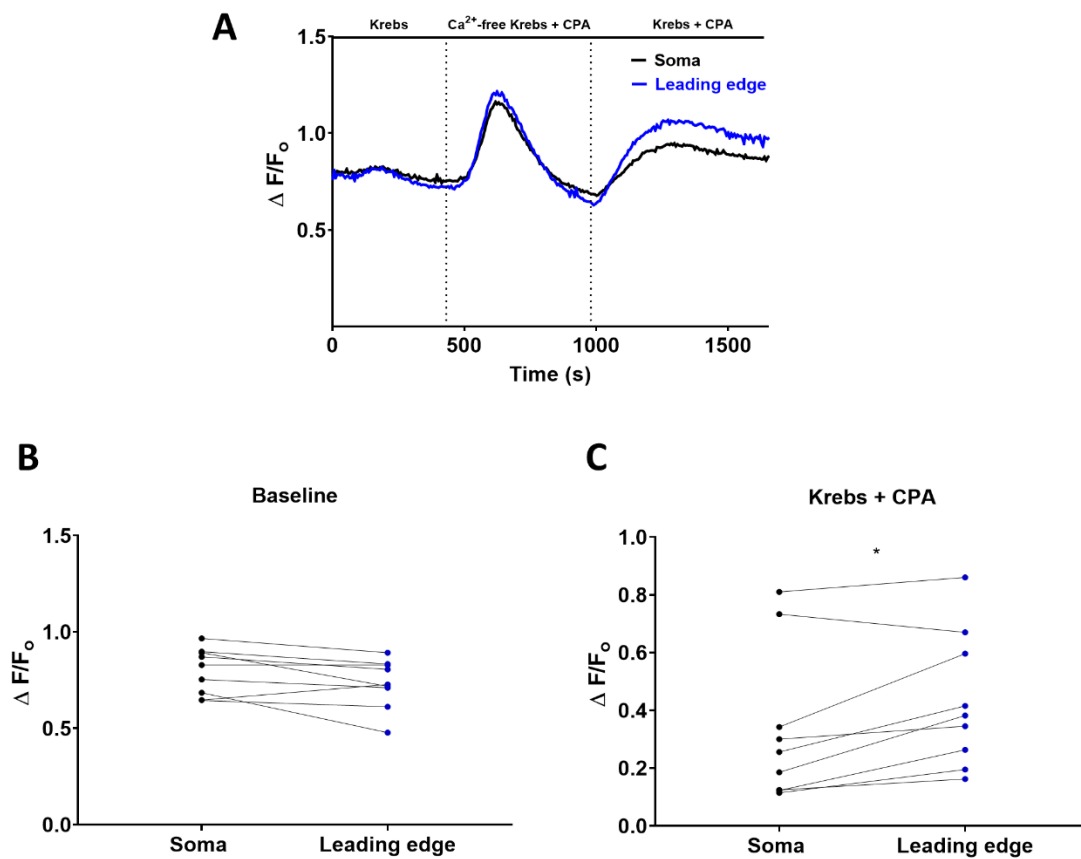

## Reciprocal Regulation of SOCE and cAMP Signaling and Human Arterial Smooth Muscle Cell Migration

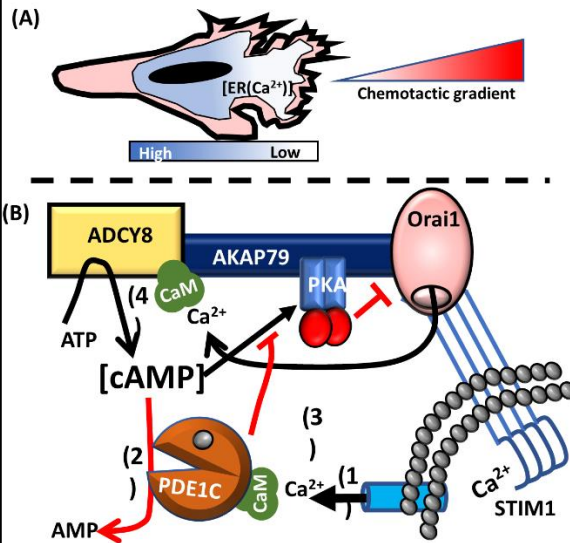

- A) A gradient of ER( $\text{Ca}^{2+}$ ) exists in polarized, motile, cells.  
 B) ER( $\text{Ca}^{2+}$ ) depletion (1), increases PDE1C cAMP hydrolysis (2), reducing Orai1 inactivation (3), increasing SOCE-mediated ADCY8 activation.

**Supplemental Table 4. PDE1C cAMP PDE activity in HASMCs 48 h post-siRNA treatment.**

| RNAi    | Ca <sup>2+</sup> /CaM stimulated cAMP PDE activity<br>(pmol/min/mg) | cAMP PDE Activity<br>(% of Basal PDE activity) |             |
|---------|---------------------------------------------------------------------|------------------------------------------------|-------------|
|         |                                                                     | PDE3                                           | PDE4        |
| Control | 57.7 ± 17.6                                                         | 43.5 ± 18.8                                    | 64.9 ± 11.0 |
| PDE1C   | 14.6 ± 13.2                                                         | 46.2 ± 7.3                                     | 57.2 ± 3.5  |

Ca<sup>2+</sup>/CaM stimulated cAMP PDE activity in HASMCs transfected with control or PDE1C siRNA and representative data of n=3 independent experiments, p<0.05 comparing Ca<sup>2+</sup>/CaM stimulated cAMP PDE activity in control versus PDE1C siRNA transfected HASMCs. % cAMP PDE activity of HASMC PDE3 and PDE4 in HASMCs treated with control or PDE1C siRNA and representative data of n=2 independent experiments is presented as a percentage of total basal HASMC cAMP PDE activity in means ± SD, p= 0.8673; comparing cAMP PDE3 activity in control versus PDE1C siRNA transfected HASMCs, p=0.4451; comparing cAMP PDE4 activity in control versus PDE1C siRNA transfected HASMCs.
